# Supplementary material
Source: PubMed Central journal article supplement (PMC5642894)
Supplement: NIHMS73544-supplement-Supplementary.pdf [file NIHMS73544-supplement-Supplementary.pdf]

Supplemental material

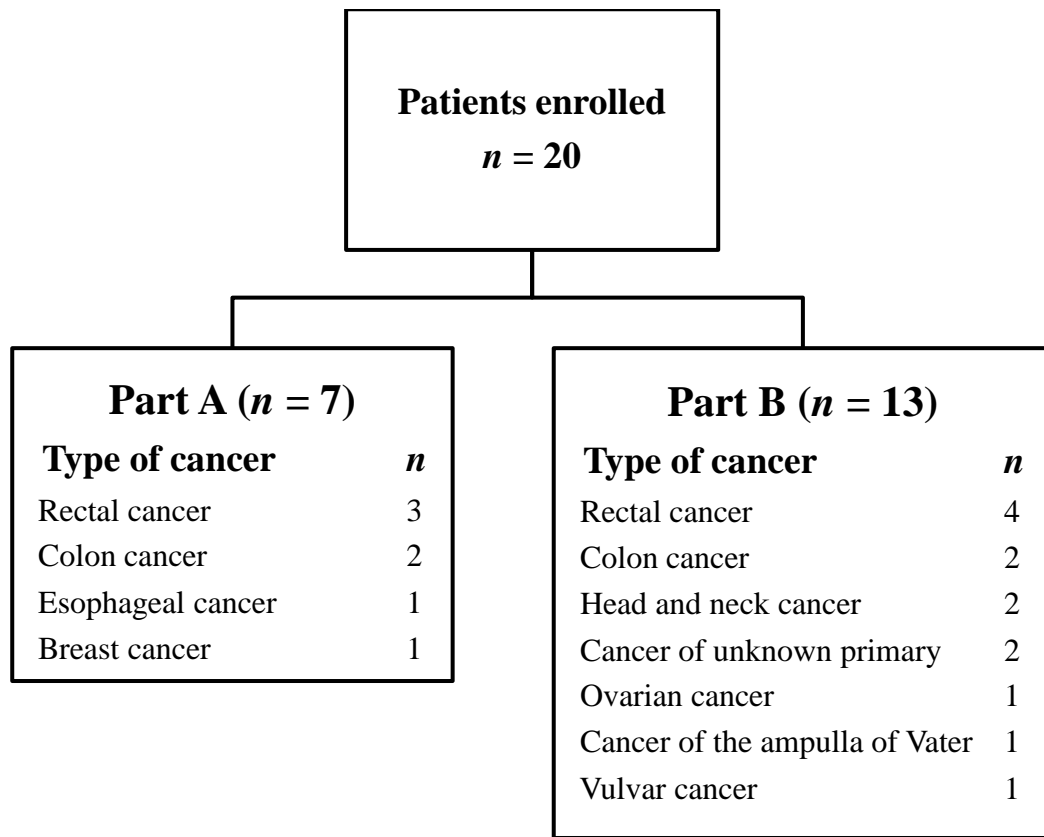

Figure S1. Cancer types per study part.

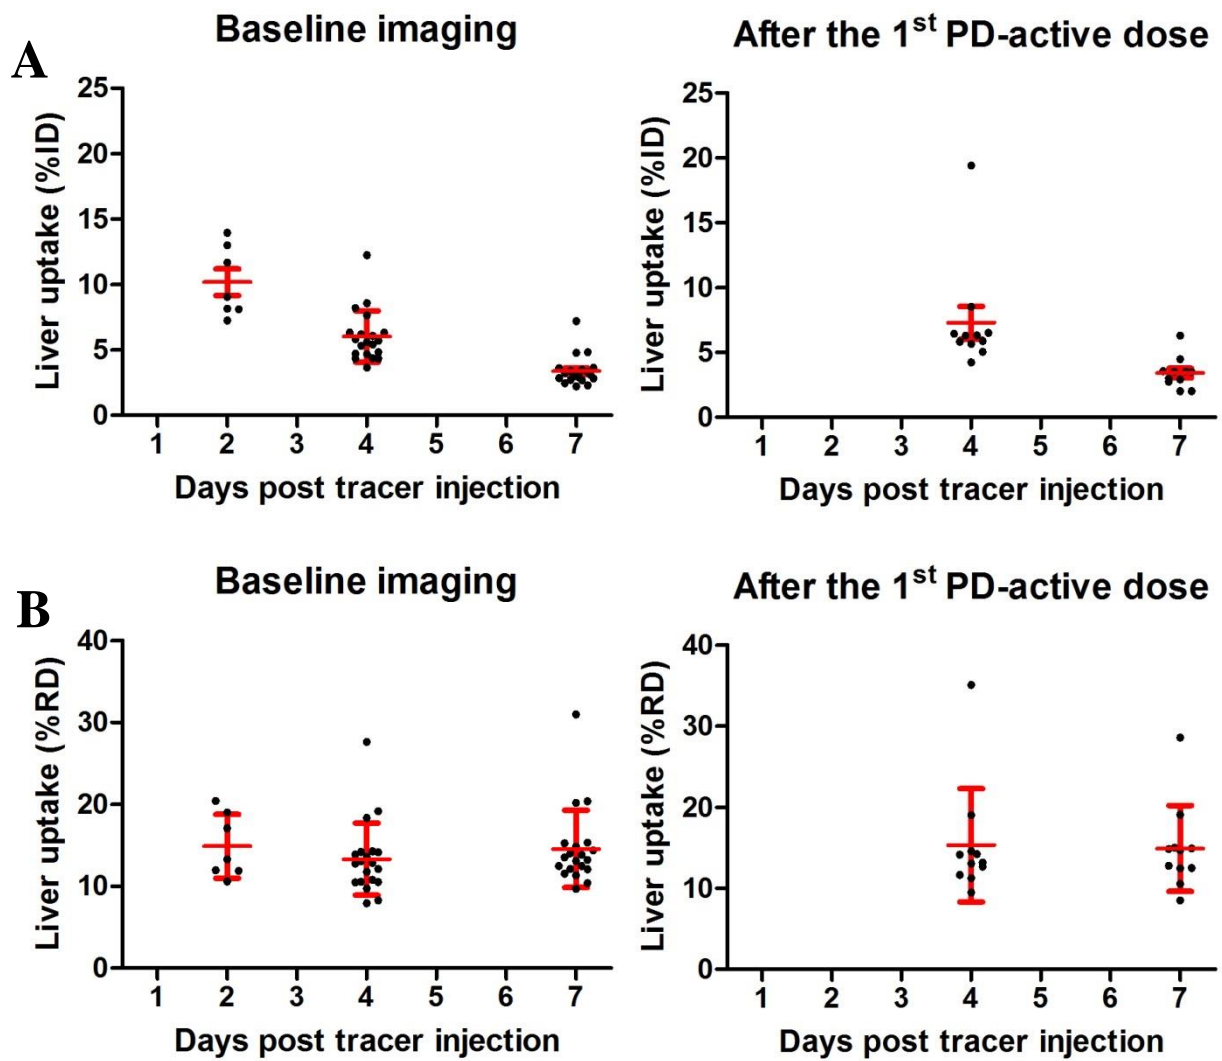

**Figure S2.** Mean ( $\pm$  SD)  $^{89}\text{Zr}$ -lumretuzumab liver uptake at baseline imaging and after the first PD-active dose assessed on PET scan and expressed as percentage of injected tracer dose (%ID, **A**) or as percentage of at this moment remaining tracer dose (%RD, **B**).

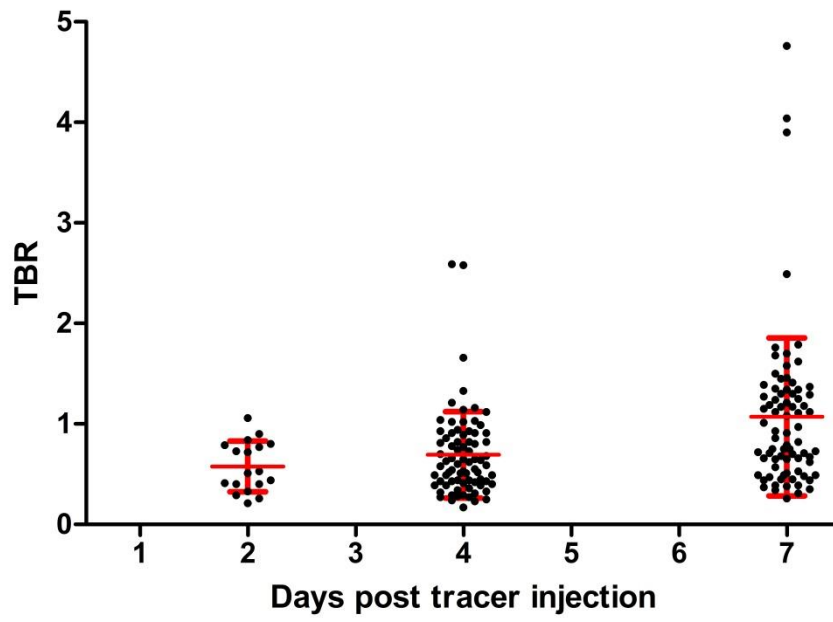

**Figure S3.** Tumor-to-blood ratio (TBR) on day 2 ( $n = 3$  patients with 18 lesions), day 4 and day 7 ( $n = 16$  patients with 77 lesions) after administration of  $^{89}\text{Zr}$ -lumretuzumab accompanied by 100 mg unlabeled lumretuzumab (baseline).

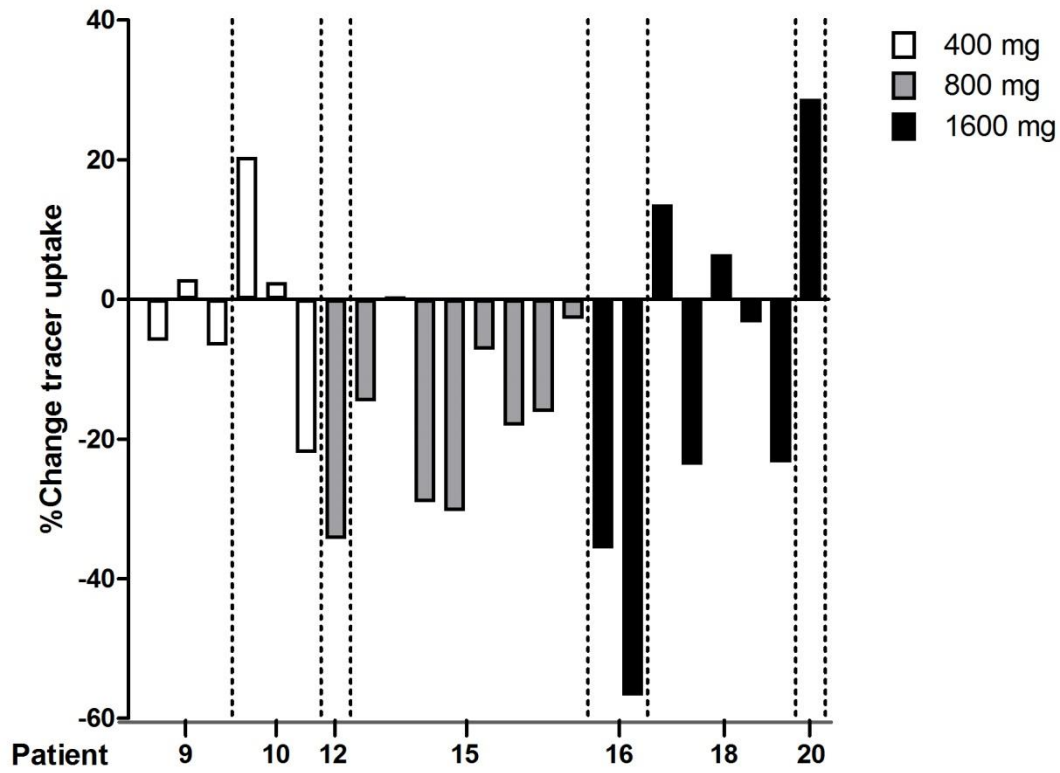

**Figure S4.** Percentage change of tracer uptake (as tumor-to-blood ratio) after the first PD-active dose of lumretuzumab (400, 800 or 1600 mg) versus baseline (100 mg unlabeled lumretuzumab) in 23 quantifiable lesions ( $n = 7$  patients) 7 days postinjection.

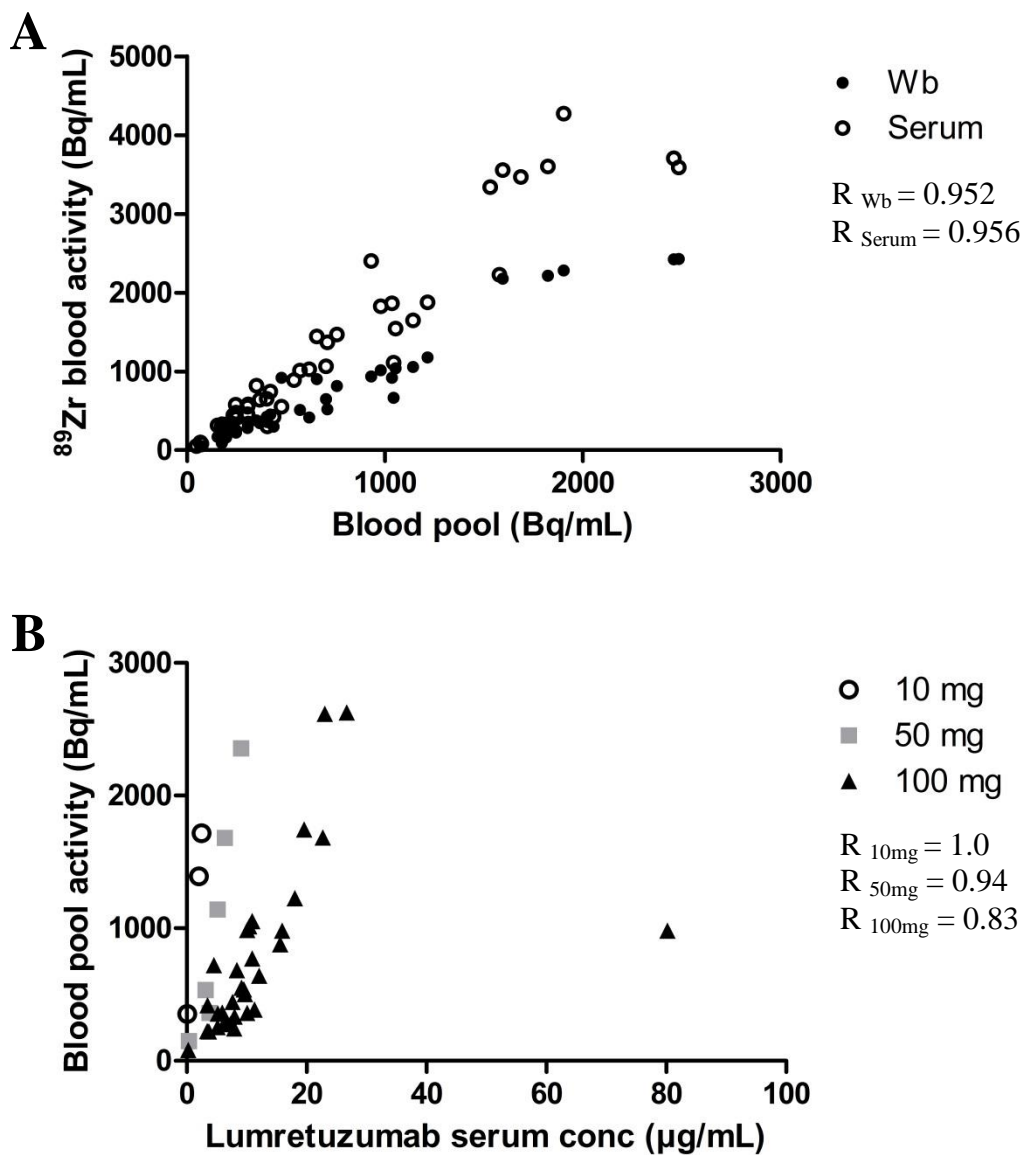

**Figure S5. A.**  $^{89}\text{Zr}$ -blood activity (counts per minute of serum or whole blood (wb) converted to SUV) versus blood pool activity on PET scans (SUVmean) at baseline. **B.** Lumretuzumab serum concentration ( $\mu\text{g/mL}$ ) versus blood pool activity on PET (Bq/mL) at baseline.

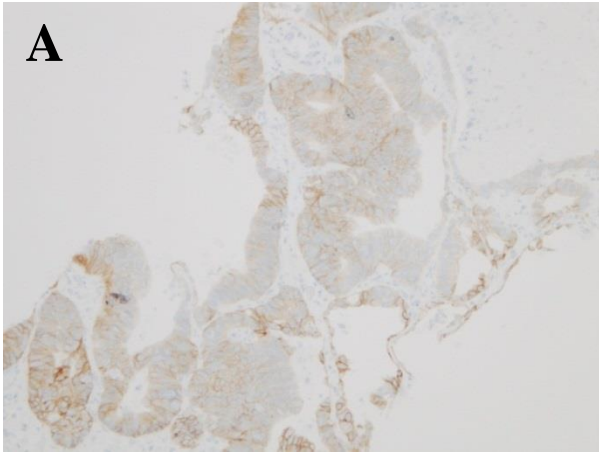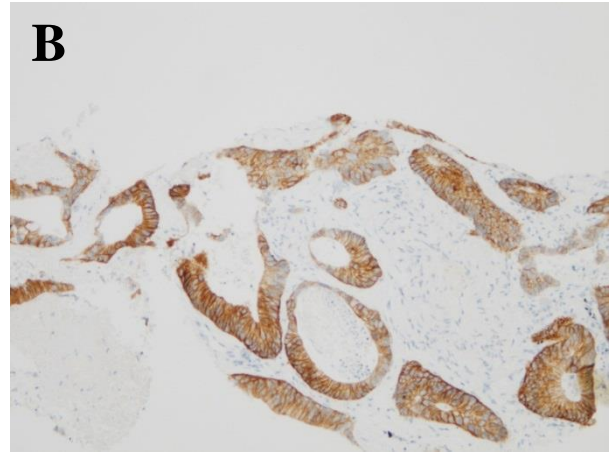

**Figure S6.** HER3 staining of two cases: patient 5 with low IRS (0.078, **A**) and patient 1 with high IRS (2.90, **B**).

**Table S1. Lesion counts based on conventional CT and <sup>89</sup>Zr-lumretuzumab PET**

| Category                                                                 | Number (%)   |
|--------------------------------------------------------------------------|--------------|
| Total number of lesions determined on diagnostic CT:                     | 598          |
| Lesions with diameter < 10 mm                                            | 382 (63.9)*  |
| Lesions with diameter ≥ 10 mm                                            | 216 (36.1)*  |
| Lesions ≥ 10 mm and visible on <sup>89</sup> Zr-lumretuzumab PET         | 146 (67.6**) |
| Lesions ≥ 10 mm and quantifiable on <sup>89</sup> Zr-lumretuzumab PET    | 115 (53.2**) |
| 10 mg unlabeled lumretuzumab                                             | 25           |
| 50 mg unlabeled lumretuzumab                                             | 13           |
| 100 mg unlabeled lumretuzumab                                            | 77           |
| Lesions ≥ 10 mm and without visible <sup>89</sup> Zr-lumretuzumab uptake | 70 (32.4**)  |
| Hepatic metastases <sup>a</sup>                                          | 19           |
| Non-hepatic lesions <sup>b</sup>                                         | 51           |
| Lung                                                                     | 27           |
| Lymph node                                                               | 11           |
| Bone                                                                     | 6            |
| Abdominal soft tissue                                                    | 3            |
| Kidney                                                                   | 2            |
| Spleen                                                                   | 1            |
| Subcutaneous lesion                                                      | 1            |

<sup>a</sup>Tracer uptake in all hepatic lesions is considered not visible and not quantifiable.

<sup>b</sup> On <sup>89</sup>Zr-lumretuzumab PET non-hepatic lesions without visible tracer uptake with a diameter of ≥ 10 mm were recorded in 17/20 patients.

\*Percentage of all lesions. \*\*Percentage of all lesions with diameter ≥ 10 mm.

**Table S2. Location of tumor lesions repeatedly quantifiable on <sup>89</sup>Zr-lumretuzumab PET scans**

| Unlabeled lumretuzumab (mg) | Number of patients | Tumor lesion, organ ( <i>n</i> )                    |
|-----------------------------|--------------------|-----------------------------------------------------|
| 400                         | 2                  | Lung (3)<br>Lymph nodes (3)                         |
| 800                         | 2                  | Lung (8)<br>Intestine (1)                           |
| 1600                        | 3                  | Lung (5)<br>Abdominal soft tissue (3 <sup>a</sup> ) |

<sup>a</sup> Two of three abdominal soft tissue lesions derived from ovarian cancer.



**Table S3. SUV of blood pool and quantifiable lesions per patient over time**

| Patient | Lesion | Blood pool (SUVmean) |       |                                |       | Tumor uptake (SUVmax) |       |                                |       |
|---------|--------|----------------------|-------|--------------------------------|-------|-----------------------|-------|--------------------------------|-------|
|         |        | Baseline             |       | 1 <sup>st</sup> PD-active dose |       | Baseline              |       | 1 <sup>st</sup> PD-active dose |       |
|         |        | Day 4                | Day 7 | Day 4                          | Day 7 | Day 4                 | Day 7 | Day 4                          | Day 7 |
| 9       | 1      | 5.84                 | 4.05  | 7.48                           | 5.14  | 4.78                  | 3.91  | 5.70                           | 4.64  |
|         | 2      |                      |       |                                |       | 5.98                  | 4.89  | 6.34                           | 5.84  |
|         | 3      |                      |       |                                |       | 3.80                  | 2.86  | 4.21                           | 3.74  |
| 10      | 1      | 5.64                 | 3.50  | 4.74                           | 4.37  | 2.97                  | 2.48  | 2.25                           | 3.72  |
|         | 2      |                      |       |                                |       | 3.74                  | 3.53  | 3.13                           | 4.52  |
|         | 3      |                      |       |                                |       | 5.03                  | 4.54  | 3.21                           | 4.42  |
| 12      | 1      | 3.93                 | 2.57  | 4.44                           | 2.82  | 3.17                  | 3.05  | 2.37                           | 2.19  |
| 15      | 1      | 4.26                 | 3.08  | 5.76                           | 4.29  | 2.32                  | 2.63  | 2.62                           | 3.13  |
|         | 2      |                      |       |                                |       | 1.84                  | 2.03  | 2.46                           | 2.84  |
|         | 3      |                      |       |                                |       | 2.50                  | 2.85  | 3.52                           | 2.82  |
|         | 4      |                      |       |                                |       | 3.40                  | 3.60  | 4.69                           | 4.20  |
|         | 5      |                      |       |                                |       | 3.28                  | 4.46  | 3.64                           | 4.33  |
|         | 6      |                      |       |                                |       | 3.87                  | 3.32  | 4.13                           | 4.50  |
|         | 7      |                      |       |                                |       | 3.88                  | 4.23  | 4.00                           | 5.46  |
|         | 8      |                      |       |                                |       | 1.93                  | 2.20  | 3.06                           | 2.51  |
| 16      | 1      | 3.08                 | 1.87  | 4.66                           | 2.93  | 7.93                  | 7.54  | 12.68                          | 7.61  |
|         | 2      |                      |       |                                |       | 7.96                  | 8.90  | 7.09                           | 6.04  |
| 18      | 1      | 4.12                 | 3.35  | 6.78                           | 3.92  | 2.79                  | 2.21  | 2.03                           | 1.99  |
|         | 2      |                      |       |                                |       | 2.24                  | 1.77  | 2.19                           | 2.36  |
|         | 3      |                      |       |                                |       | 2.64                  | 2.65  | 2.90                           | 2.37  |
|         | 4      |                      |       |                                |       | 1.77                  | 1.63  | 2.61                           | 2.04  |
|         | 5      |                      |       |                                |       | 1.61                  | 1.52  | 2.32                           | 1.72  |
| 20      | 1      | 4.82                 | 3.36  | 5.90                           | 3.34  | 5.51                  | 5.91  | 6.12                           | 7.57  |

**Table S4. Most frequent adverse events (reported for at least 3 patients)**

| <b>Event <sup>a</sup></b>         | <b>Number of patients (%)</b> | <b>Number of patients with Grade 3 events (%) <sup>b</sup></b> |
|-----------------------------------|-------------------------------|----------------------------------------------------------------|
| Diarrhea                          | 9 (45)                        | -                                                              |
| Infusion-related reaction         | 5 (25)                        | -                                                              |
| Abdominal pain                    | 4 (20)                        | -                                                              |
| Upper respiratory tract infection | 4 (20)                        | -                                                              |
| Urinary tract infection           | 3 (15)                        | -                                                              |
| Fatigue                           | 3 (15)                        | 2 (10%)                                                        |
| Pyrexia                           | 3 (15)                        | -                                                              |

<sup>a</sup> A total of 101 adverse events were experienced by 20 patients. 33 events were considered related and reported for 14 patients (70%).

<sup>b</sup> A total of six Grade 3 events were reported in 4 patients. Next to fatigue, hypokalemia and pruritus were observed in a single patient each (5%). No events with Grade 4 or higher were observed.
